# Supplementary material
Source: PubMed Central journal article supplement (PMC7612717)
Supplement: EMS144079-supplement-Appendix.pdf [file EMS144079-supplement-Appendix.pdf]

## AUTHORS' DISCLOSURES OF POTENTIAL CONFLICTS OF INTEREST

## Quality of Life in Men With Prostate Cancer Randomly Allocated to Receive Docetaxel or Abiraterone in the STAMPEDE Trial

The following represents disclosure information provided by authors of this manuscript. All relationships are considered compensated unless otherwise noted. Relationships are self-held unless noted. I = Immediate Family Member, Inst = My Institution. Relationships may not relate to the subject matter of this manuscript. For more information about ASCO's conflict of interest policy, please refer to [www.asco.org/rwc](http://www.asco.org/rwc) or [ascopubs.org/jco/authors/author-center](http://ascopubs.org/jco/authors/author-center).

Open Payments is a public database containing information reported by companies about payments made to US-licensed physicians ([Open Payments](#)).

**Alicia K. Morgans**

**Honoraria:** Genentech, Janssen, Sanofi, AstraZeneca, Astellas Scientific and Medical Affairs Inc, Astellas Pharma, Janssen Oncology, Bayer, Janssen, Clovis Oncology, Myovant Sciences, Advanced Accelerator Applications, Exelixis, Pfizer, Merck

**Consulting or Advisory Role:** AstraZeneca, Sanofi, Bayer, Astellas Pharma, Janssen, Advanced Accelerator Applications, Myovant Sciences, Blue Earth Diagnostics, Myovant Sciences, Exelixis, Novartis, Myriad Genetics, Lantheus Medical Imaging, Merck

**Research Funding:** Bayer, Seattle Genetics/Astellas, Genentech, AstraZeneca, Astellas Scientific and Medical Affairs Inc, Dendreon, Sanofi, Myovant Sciences  
**Travel, Accommodations, Expenses:** Sanofi

**Noel W. Clarke**

**Honoraria:** Janssen-Cilag, Astellas Pharma, Sanofi, Bayer, AstraZeneca, Ferring, Ipsen

**Consulting or Advisory Role:** Astellas Pharma, Janssen-Cilag, Ferring, Bayer, Sanofi

**Speakers' Bureau:** Janssen-Cilag, Astellas Pharma

**Research Funding:** Astrazeneca

**Travel, Accommodations, Expenses:** Janssen-Cilag, Astellas Pharma, Sanofi, Bayer, AstraZeneca, Ferring, Ipsen

**Gerhardt Attard**

**Honoraria:** Astellas Pharma, Janssen (I)

**Consulting or Advisory Role:** Janssen-Cilag, Veridex, Ventana Medical Systems, Astellas Pharma, Medivation, Novartis, Millennium, Abbott Laboratories, ESSA, Bayer, Pfizer, AstraZeneca, Ferring

**Speakers' Bureau:** Janssen, Astellas Pharma, Takeda, Sanofi, Ventana Medical Systems, Ipsen, AstraZeneca, Ferring

**Research Funding:** Janssen, Arno Therapeutics, Innocrin Pharma

**Patents, Royalties, Other Intellectual Property:** I am on The ICR rewards to inventors list of abiraterone acetate

**Travel, Accommodations, Expenses:** Astellas Pharma, Medivation, Ventana Medical Systems, Abbott Laboratories, Bayer, ESSA, Janssen (I), Astellas Pharma (I), Pfizer (I), Ferring

**Other Relationship:** Institute of Cancer Research

**David P. Dearnaley**

**Patents, Royalties, Other Intellectual Property:** Abiraterone acetate was developed at The Institute of Cancer Research, which therefore has a commercial interest in the development of this agent. Professor Dearnaley is on the Institute's Rewards to Inventors list for abiraterone acetate, patent issued EP1933709B1 (location and stabilization device)

**Travel, Accommodations, Expenses:** Janssen Oncology

**Christopher C. Parker**

**Honoraria:** Bayer, Janssen

**Consulting or Advisory Role:** Clarity Pharmaceuticals, Myovant Sciences, ITM Oncologics

**Silke Gillessen**

**Consulting or Advisory Role:** Astellas Pharma (Inst), Janssen (Inst), Bayer (Inst), Orion Pharma GmbH, Tolero Pharmaceuticals (Inst), MSD Oncology (Inst), Roche (Inst), Amgen, Pfizer (Inst), BMS (Inst), Telix Pharma (Inst), MSD Oncology, AAA HealthCare (Inst), Orion Corporation (Inst), Amgen (Inst)

**Patents, Royalties, Other Intellectual Property:** Method for biomarker (WO 3752009138392 A1)

**Travel, Accommodations, Expenses:** ProteoMedix

**Other Relationship:** ProteoMedix, Aranda Pharma (Inst), Menarini Silicon Biosystems (Inst)

**Christopher D. Brawley**

**Research Funding:** Astellas Pharma, Clovis Oncology, Janssen, Sanofi/Aventis, Pfizer, Novartis,

**Jacob S. Tanguay**

**Consulting or Advisory Role:** AstraZeneca, Astellas Pharma, Bayer

**Travel, Accommodations, Expenses:** Janssen, Roche, Bayer

**Robert J. Jones**

**Honoraria:** Astellas Pharma, Janssen, AstraZeneca, MSD Oncology, Bristol Myers Squibb, Pfizer, Novartis, Ipsen, Seattle Genetics, Sanofi, Bayer, Roche/Genentech, EUSA Pharma, Pharmacyclics, Clovis Oncology

**Research Funding:** Roche, Astellas Pharma, AstraZeneca, Pfizer, Novartis, Exelixis, Clovis Oncology, Bayer

**Travel, Accommodations, Expenses:** Ipsen, Bayer, Janssen, Astellas Pharma, MSD

**John Wagstaff**

**Honoraria:** Bristol Myers Squibb, Roche, Pierre Fabre, Novartis, GlaxoSmithKline UK Ltd., Pfizer

**Consulting or Advisory Role:** Bristol Myers Squibb, Roche, Pfizer, Novartis, Pierre Fabre

**Speakers' Bureau:** Bristol Myers Squibb

**Sarah Rudman**

**Honoraria:** Bristol Myers Squibb Foundation, EUSA Pharma, Ipsen, Pfizer

**Consulting or Advisory Role:** Ipsen, Pfizer, EUSA Pharma

**Joe M. O'Sullivan**

**Consulting or Advisory Role:** Bayer, Janssen, Astellas Pharma, Sanofi, Novartis

**Speakers' Bureau:** Bayer, Janssen, Novartis

**Research Funding:** Bayer

**Alison Birtle**

**Honoraria:** Janssen-Cilag

**Consulting or Advisory Role:** Roche, Astellas Medivation, Janssen Oncology, AstraZeneca, Sanofi, Bayer Schering Pharma, Bristol Myers Squibb, Merck Serono, Pfizer

**Speakers' Bureau:** Bayer, Janssen Oncology, Pfizer

**Research Funding:** Genzyme

**Andrew Protheroe**

**Employment:** Genesis Cancer Care

**Honoraria:** Astellas Pharma, MSD Oncology, Ipsen, Astellas Pharma, Merck Serono, Eisai, Merck

**Travel, Accommodations, Expenses:** Bayer, EUSA Pharma

**Emma Gray**

**Employment:** Genesis Cancer Care

**Honoraria:** Astellas Pharma, MSD Oncology, Ipsen, Astellas Pharma, Merck Serono, Eisai, Merck

**Travel, Accommodations, Expenses:** Bayer, EUSA Pharma

**Neil McPhail**

**Consulting or Advisory Role:** Eisai, GlaxoSmithKline, Ipsen

**Travel, Accommodations, Expenses:** Ipsen

**Zaf I. Malik**

**Consulting or Advisory Role:** Sanofi/Aventis

**Salil Vengalil**

**Honoraria:** Bristol Myers Squibb, Pfizer

**Consulting or Advisory Role:** Merck/Pfizer

**Travel, Accommodations, Expenses:** Ipsen

**Peter Hoskin**

**Research Funding:** Varian Medical Systems, Astellas Pharma, Bayer, Roche, Pfizer, Elekta

**Matthew R. Sydes**

**Honoraria:** Lilly, Sanofi, Janssen

**Research Funding:** Astellas Pharma, Janssen-Cilag, Pfizer, Novartis, Sanofi, Clovis Oncology

**Simon Chowdhury**

**Honoraria:** Clovis Oncology, Novartis

**Consulting or Advisory Role:** Clovis Oncology, Astellas Pharma, Bayer, Pfizer, Janssen-Cilag, BeiGene, Novartis

**Speakers' Bureau:** Pfizer, Janssen-Cilag

**Research Funding:** Sanofi/Aventis

**Mahesh K. B. Parmar**

**Research Funding:** AstraZeneca, Astellas Pharma, Janssen, Clovis Oncology

**Nicholas D. James**

**Honoraria:** Sanofi, Bayer, Janssen, Astellas Pharma

**Consulting or Advisory Role:** Sanofi, Bayer, Astellas Pharma, Janssen, Clovis Oncology, EUSA pharma, pfizer

**Speakers' Bureau:** Pierre Fabre, Ferring, Sanofi, Astellas Pharma, Janssen Oncology, Merck

**Research Funding:** Janssen, Astellas Pharma, Pfizer, Sanofi, Novartis, AstraZeneca

**Travel, Accommodations, Expenses:** Sanofi, Janssen

**Ruth E. Langley**

**Consulting or Advisory Role:** Bayer Schering Pharma

**Research Funding:** Bayer Schering Pharma

No other potential conflicts of interest were reported.

## APPENDIX

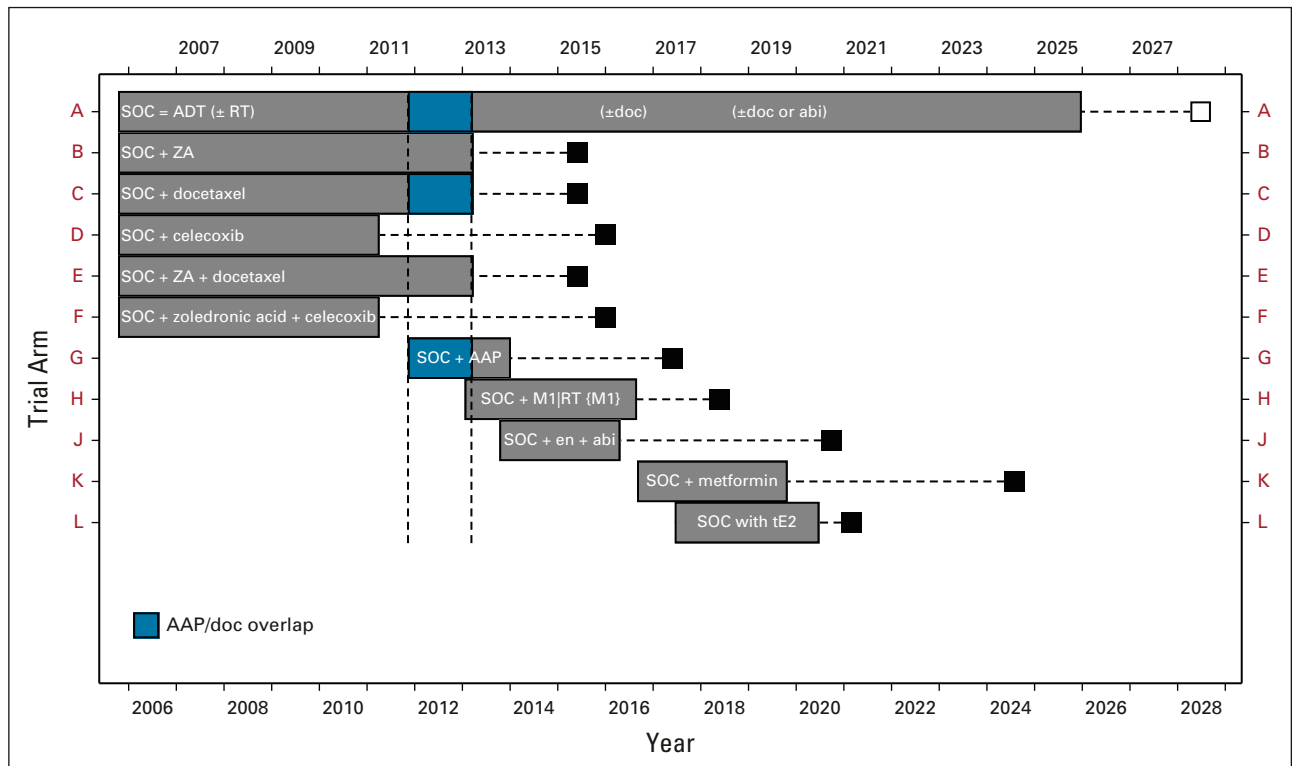

**FIG A1.** Activity by time in the STAMPEDE trial. Gray boxes represent periods of recruitment (x-axis) to each of the trial arms (y-axis). The black squares represent the timepoint of the first key comparative analysis for each trial arm. Patients included in this QOL analysis were randomly assigned during the period highlighted in blue; the primary analysis is between docetaxel + SOC and AAP + SOC, with SOC patients presented for context. AAP, abiraterone acetate plus prednisone or prednisolone; abi, abiraterone; doc, docetaxel; en, enzalutamide; M1, metastatic prostate cancer; QOL, quality of life; SABR, stereotactic ablative radiotherapy; SOC, standard of care; tE2, transdermal oestradiol; ZA, zoledronic acid.

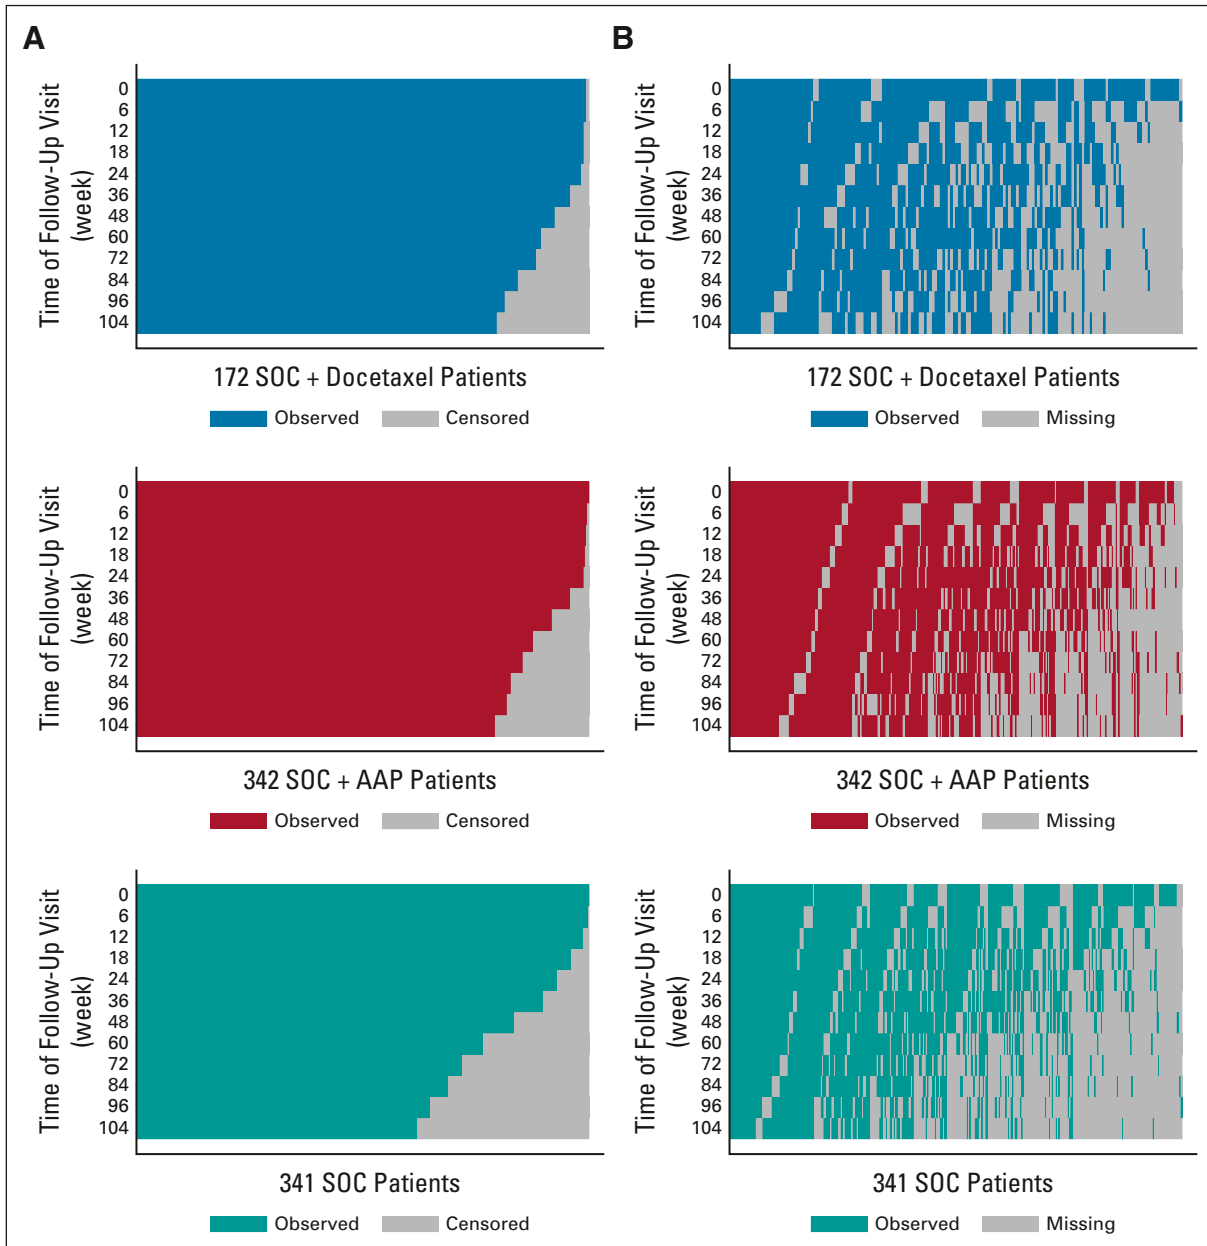

**FIG A2.** Patterns of missing patient data. (A) Censored data presented per allocated treatment. Each row represents a follow-up appointment where we would expect the patient to complete a QOL questionnaire. Each column represents a patient. A solid color indicates the patient was considered in this analysis. Gray means the patient was censored for starting second-line treatment or death and any data received did not contribute to the analysis. (B) Missing data presented by allocated treatment. Each row represents a follow-up appointment where we would expect the patient to complete a QOL questionnaire. Each column represents a patient. A solid color indicates the patient provided a QOL questionnaire at this timepoint. Gray means there was no QOL questionnaire received and reflects missing data from the analysis. AAP, abiraterone acetate plus prednisolone or prednisone; QOL, quality of life.

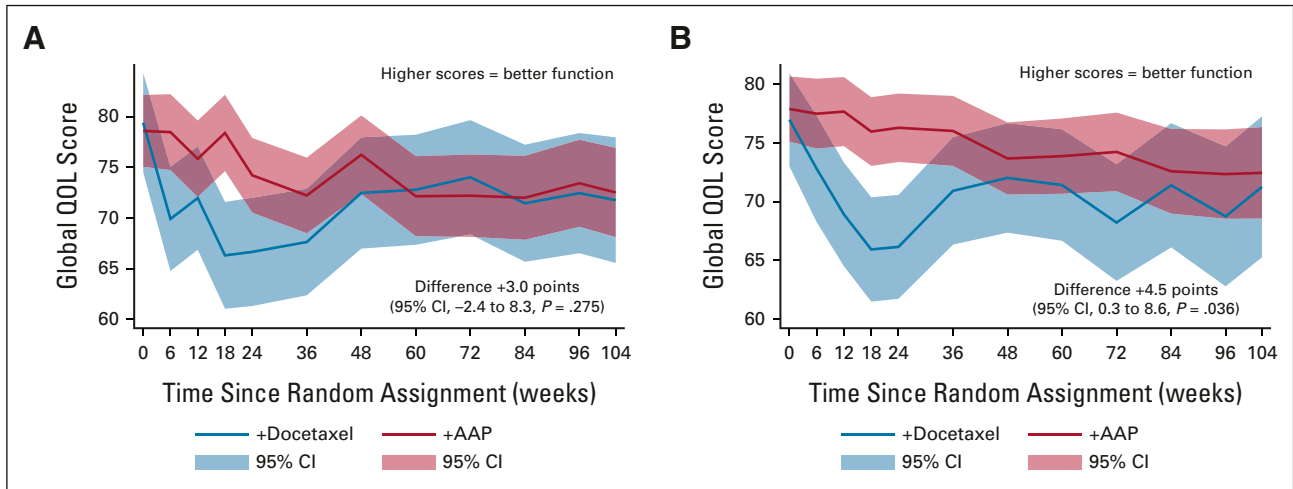

**FIG A3.** Longitudinal analysis showing global-QOL score over the first 2 years in patients with nonmetastatic disease and metastatic disease, separating scores for patients treated with docetaxel + SOC versus AAP + SOC. The difference is calculated by subtracting the docetaxel + SOC score from the AAP + SOC score; a positive difference represents a higher QOL for patients treated with AAP + SOC and a negative difference indicates a higher QOL for patients receiving docetaxel + SOC. Higher scores indicate better QOL. All scores are corrected as per QLQ-C30 guidelines to range from 0 to 100: (A) nonmetastatic disease and (B) metastatic disease. AAP, abiraterone acetate plus prednisone or prednisolone; QOL, quality of life; SOC, standard of care.

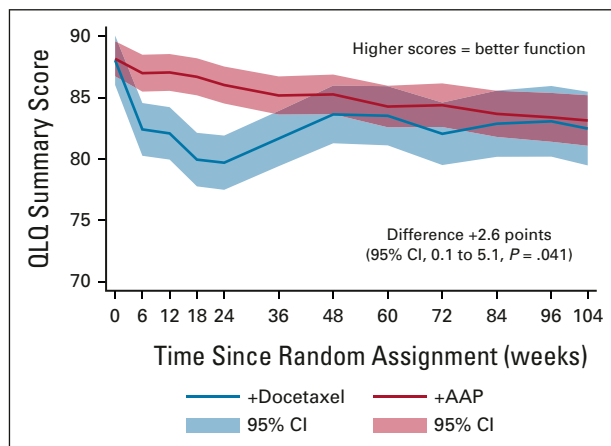

**FIG A4.** Longitudinal analysis showing the QLQ-C30 summary score over the first 2 years, separating scores for patients treated with docetaxel + SOC versus AAP + SOC. The difference is calculated by subtracting the docetaxel + SOC score from the AAP + SOC score; a positive difference represents a higher QOL for patients treated with AAP + SOC and a negative difference indicates a higher QOL for patients receiving docetaxel + SOC. Higher scores indicate better quality of life. All scores are corrected as per QLQ-C30 guidelines to range from 0 to 100. AAP, abiraterone acetate plus prednisone or prednisolone; QOL, quality of life; SOC, standard of care.

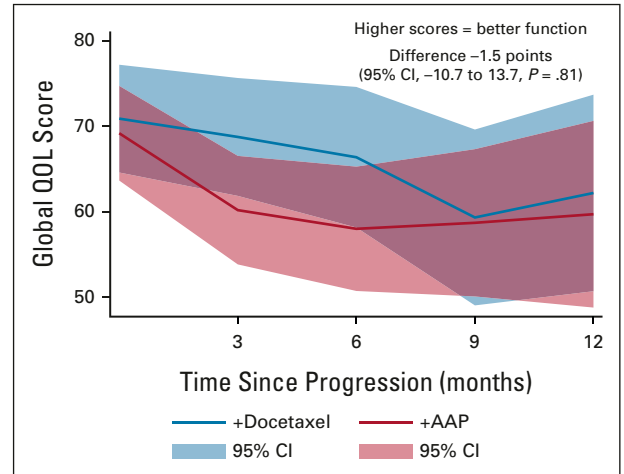

**FIG A5.** Longitudinal analysis showing the global-QOL score that occurred after progression, separating scores for patients treated in the upfront setting with docetaxel + SOC and AAP + SOC (ie, postprogression patients are potentially now receiving a different subsequent treatment). The difference is calculated by subtracting the docetaxel + SOC score from the AAP + SOC score; thus, positive a difference represents a higher QOL for patients treated with AAP + SOC and a negative difference indicates a higher QOL for patients treated with docetaxel + SOC. Higher scores indicate better quality of life. All scores are corrected as per QLQ-C30 guidelines to range from 0 to 100. AAP, abiraterone acetate plus prednisone or prednisolone; QOL, quality of life; SOC, standard of care.

**TABLE A1.** Suggested Boundaries for Determining Magnitude of Difference in QOL Scores and Whether a Difference is Clinically Meaningful: Small, Moderate, and Large Differences Are all Considered Potentially Clinically Meaningful

| <b>Boundary</b>       | <b>Trivial</b> | <b>Small</b> | <b>Moderate</b> | <b>Large</b> |
|-----------------------|----------------|--------------|-----------------|--------------|
| Global-QOL            | 0-4            | 4-10         | 10-15           | > 15         |
| Physical functioning  | 0-5            | 5-14         | 14-22           | > 22         |
| Social functioning    | 0-5            | 5-11         | 11-15           | > 15         |
| Role functioning      | 0-6            | 6-19         | 19-29           | > 29         |
| Cognitive functioning | 0-3            | 3-9          | 9-14            | > 14         |
| Pain                  | 0-6            | 6-13         | 13-19           | > 19         |
| Fatigue               | 0-5            | 5-13         | 13-19           | > 19         |

NOTE. This table has been adapted from Cocks et al.<sup>15</sup>

Abbreviation: QOL, quality of life.

**TABLE A2.** Proportion of Missing QOL Data at Each Timepoint for Patients in Treated With SOC, Docetaxel + SOC, and AAP + SOC

| <b>Week</b> | <b>SOC</b>      |                 |          | <b>Docetaxel + SOC</b> |                 |          | <b>AAP + SOC</b> |                 |          |
|-------------|-----------------|-----------------|----------|------------------------|-----------------|----------|------------------|-----------------|----------|
|             | <b>Received</b> | <b>Expected</b> | <b>%</b> | <b>Received</b>        | <b>Expected</b> | <b>%</b> | <b>Received</b>  | <b>Expected</b> | <b>%</b> |
| 0           | 283             | 341             | 83       | 153                    | 171             | 89       | 303              | 342             | 89       |
| 6           | 235             | 340             | 69       | 112                    | 171             | 65       | 239              | 341             | 70       |
| 12          | 245             | 336             | 73       | 116                    | 170             | 68       | 249              | 340             | 73       |
| 18          | 226             | 327             | 69       | 109                    | 170             | 64       | 248              | 339             | 73       |
| 24          | 226             | 317             | 71       | 108                    | 169             | 64       | 265              | 338             | 78       |
| 36          | 223             | 306             | 73       | 109                    | 165             | 66       | 253              | 328             | 77       |
| 48          | 204             | 284             | 72       | 106                    | 159             | 67       | 241              | 314             | 77       |
| 60          | 183             | 261             | 70       | 111                    | 154             | 72       | 229              | 300             | 76       |
| 72          | 164             | 245             | 67       | 103                    | 152             | 68       | 216              | 292             | 74       |
| 84          | 157             | 235             | 67       | 95                     | 145             | 66       | 198              | 283             | 70       |
| 96          | 132             | 221             | 60       | 82                     | 140             | 59       | 185              | 280             | 66       |
| 104         | 134             | 211             | 64       | 79                     | 137             | 58       | 183              | 271             | 68       |
| Total       | 2,412           | 3,424           | 70       | 1,283                  | 1,903           | 67       | 2,809            | 3,768           | 75       |

NOTE. The expected denominator reflects all patients who had not been censored (patients were censored at start of second-line treatment or death) at each timepoint. Received is the number of QOL questionnaires received at each timepoint.

Abbreviations: AAP, abiraterone acetate plus prednisone or prednisolone; QOL, quality of life; SOC, standard of care.
